# Supplementary material for: Coconut oleosomes as a sustainable ingredient for food emulsion systems
Source: Royal Society of Chemistry journal article supplement (doi:10.1039/d5fb00112a), 2025-01-01
Supplement: d5fb00112a1.pdf [file d5fb00112a1.pdf]

# Supplementary Information

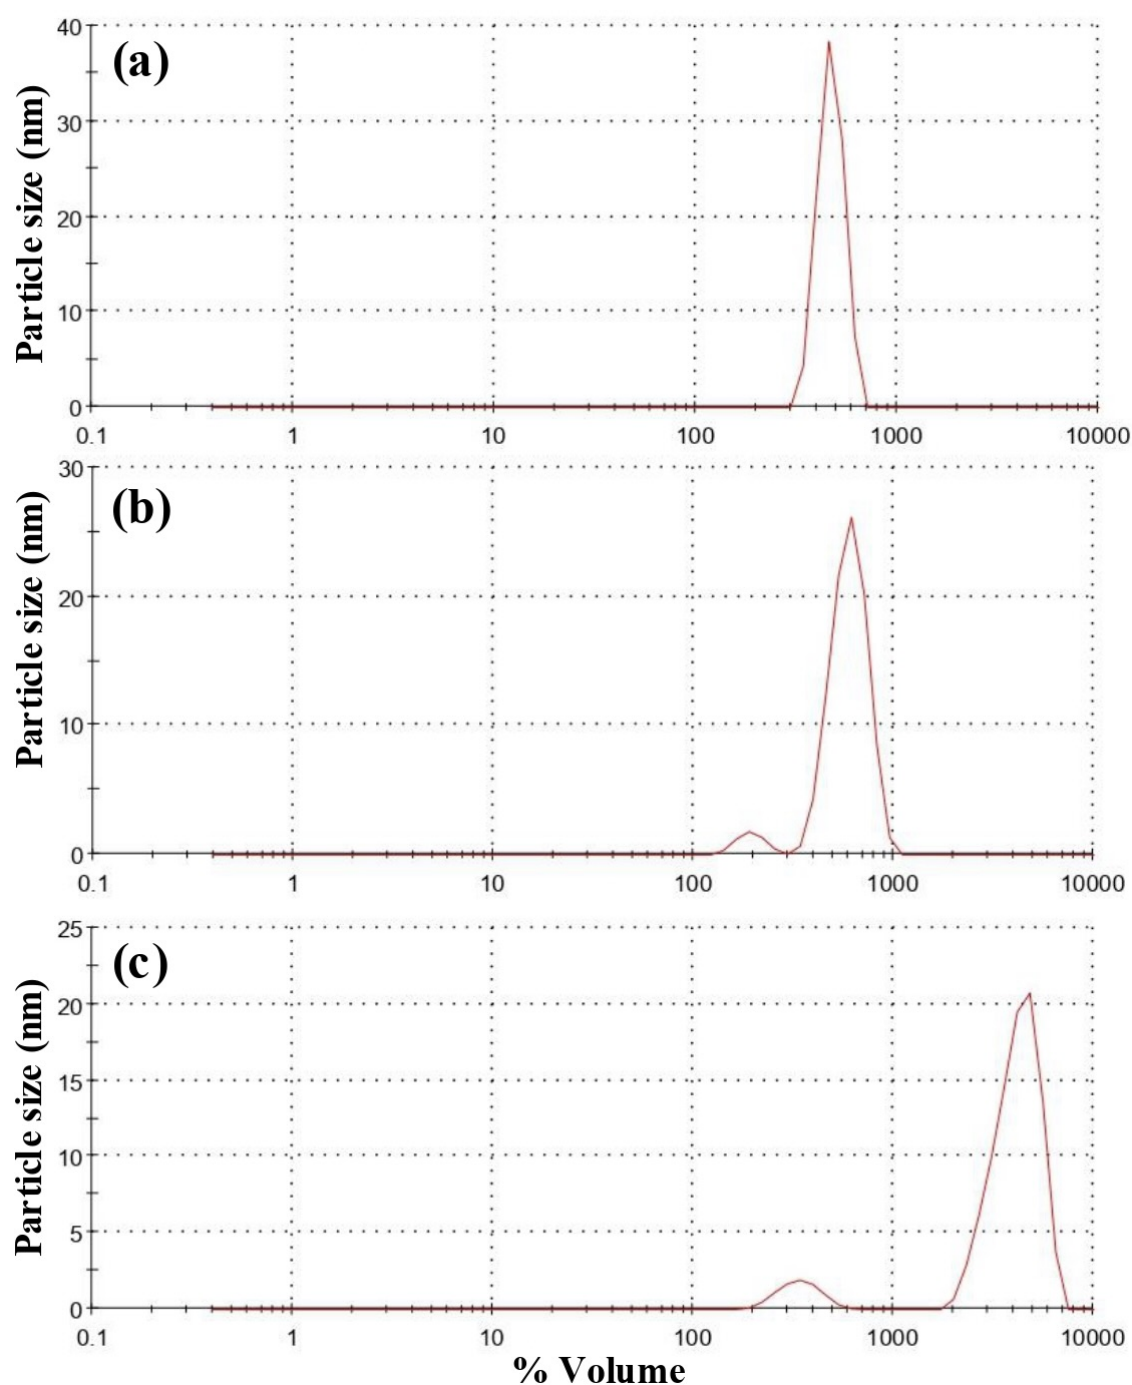

**Fig S1.** Particle size distribution of (a) oleosome, (b) control mayonnaise, and (c) oleosome-based mayonnaise at pH 7. Control mayonnaise had a droplet size distribution of 0.6 (95%) and 0.2 (5%)  $\mu\text{m}$ . However, the droplet size distribution by volume of VCM was higher and found to be 4.2 (92%) and 0.35  $\mu\text{m}$  (8%).
